# Supplementary material
Source: PubMed Central journal article supplement (PMC2772869)

**Neuron, Volume 63**

**Supplemental Data**

**The microRNA *bantam* Functions in Epithelial Cells to Regulate Scaling Growth of Dendrite Arbors in *Drosophila* Sensory Neurons**

**Jay Z. Parrish, Peizhang Xu, Charles C. Kim, Lily Yeh Jan, and Yuh Nung Jan**

**Table S1.** Alleles used in this study.

| <b>Mutant alleles</b>          | <b>Gene name</b>                                                | <b>Source</b>                      |
|--------------------------------|-----------------------------------------------------------------|------------------------------------|
| <i>ban<sup>AI</sup></i>        | bantam                                                          | Cohen Lab (Brennecke et al., 2003) |
| <i>shr<sup>1</sup></i>         | shrunk                                                          | Bloomington Stock Center (BL396)   |
| <i>std<sup>1</sup></i>         | staroid                                                         | Bloomington Stock Center (BL411)   |
| <i>twf<sup>EP3701</sup></i>    | twinfillin                                                      | Bloomington Stock Center (BL17157) |
| <i>Ddc<sup>k02104</sup></i>    | Dopa decarboxylase                                              | Bloomington Stock Center (BL10508) |
| <i>Tor<sup>k17004</sup></i>    | Target of rapamycin                                             | Bloomington Stock Center (BL11218) |
| <i>Tor<sup>AP</sup></i>        | Target of rapamycin                                             | Bloomington Stock Center (BL7014)  |
| <i>shj<sup>2</sup></i>         | shifted                                                         | Bloomington Stock Center (BL112)   |
| <i>gt<sup>E6</sup></i>         | giant                                                           | Bloomington Stock Center (BL1530)  |
| <i>gt<sup>1</sup></i>          | giant                                                           | Bloomington Stock Center (BL53)    |
| <i>Pdp1<sup>P205</sup></i>     | Pyruvate dehydrogenase phosphatase                              | Bloomington Stock Center (BL6932)  |
| <i>Tctp<sup>EY09182</sup></i>  | Translationally controlled tumor protein                        | Bloomington Stock Center (BL16927) |
| <i>InR93<sup>Dj-4</sup></i>    | Insulin Receptor                                                | Bloomington Stock Center (BL9554)  |
| <i>InR<sup>E19</sup></i>       | Insulin Receptor                                                | Bloomington Stock Center (BL9646)  |
| <i>Akt<sup>104226</sup></i>    | Akt/Protein Kinase B                                            | Bloomington Stock Center (BL11627) |
| <i>Akt<sup>9</sup></i>         | Akt/Protein Kinase B                                            | Tian Xu                            |
| <i>step<sup>k08110</sup></i>   | steppke                                                         | Bloomington Stock Center (BL10770) |
| <i>cdc2<sup>c2</sup></i>       | cdc2                                                            | Bloomington Stock Center (BL6632)  |
| <i>Cdk4<sup>3</sup></i>        | Cyclin-dependent kinase 4                                       | Bloomington Stock Center (BL6644)  |
| <i>Rheb<sup>AV4</sup></i>      | Rheb                                                            | Bloomington Stock Center (BL9690)  |
| <i>slik<sup>KG04837</sup></i>  | Sterile20-like kinase                                           | Bloomington Stock Center (BL14435) |
| <i>klu<sup>09036</sup></i>     | klumpfuss                                                       | Bloomington Stock Center (BL11733) |
| <i>chico<sup>1</sup></i>       | chico                                                           | Bloomington Stock Center (BL10738) |
| <i>CG3511<sup>1</sup></i>      | CG3511                                                          | Bloomington Stock Center (BL8198)  |
| <i>Stat92E<sup>06346</sup></i> | Signal-transducer and activator of transcription protein at 92E | Bloomington Stock Center (BL11681) |
| <i>tkd<sup>1</sup></i>         | thickoid                                                        | Bloomington Stock Center (BL426)   |
| <i>Csk<sup>1D8</sup></i>       | C-terminal Src kinase                                           | Bloomington Stock Center (BL10244) |
| <i>l(2)gl<sup>1</sup></i>      | lethal giant larvae                                             | Jan lab                            |
| <i>l(2)gl<sup>4</sup></i>      | lethal giant larvae                                             | Bloomington Stock Center (BL9042)  |
| <i>G-sα60AB<sup>19</sup></i>   | G protein α 60A                                                 | Bloomington Stock Center (BL6339)  |
| <i>Eip75B<sup>a81</sup></i>    | Ecdysone-induced protein at 75B                                 | Bloomington Stock Center (BL23654) |
| <i>br<sup>1</sup></i>          | broad                                                           | Bloomington Stock Center (BL3994)  |
| <i>esc<sup>21</sup></i>        | extra sex combs                                                 | Bloomington Stock Center (BL3623)  |
| <i>fry<sup>1</sup></i>         | furry                                                           | Jan lab                            |
| <i>sav<sup>3</sup></i>         | salvador                                                        | Jan lab                            |
| <i>b-6-22</i>                  | unknown                                                         | Jan lab (SY, unpublished data)     |

| <b>Deficiencies</b>             | <b>Source/Description</b>                 |
|---------------------------------|-------------------------------------------|
| Df(3L)Exel6086                  | Bloomington Stock Center (BL7565)         |
| Df(3L)ED4177                    | Bloomington Stock Center (BL8048)         |
| <b>UAS Transgenes</b>           | <b>Source</b>                             |
| <i>UAS-ban-A</i>                | Cohen Lab (Brennecke et al., 2003)        |
| <i>UAS-ban-B</i>                | Cohen Lab (Brennecke et al., 2003)        |
| <i>UAS-ban-C</i>                | Cohen Lab (Brennecke et al., 2003)        |
| <i>UAS-ban-D</i>                | Cohen Lab (Brennecke et al., 2003)        |
| <i>UAS-ban-PX</i>               | This study                                |
| <i>UAS-Akt</i>                  | Bloomington Stock Center (BL8191)         |
| <i>UAS-Pten</i>                 | Tian Xu                                   |
| <i>UAS-Pi3K (CAAX)</i>          | Bloomington Stock Center (BL8294)         |
| <i>UAS-Dcr-2</i>                | Bloomington Stock Center (BL24650)        |
| <i>UAS-Akt(RNAi)</i>            | Vienna Drosophila Resource Center (v2902) |
| <b>Gal4 Drivers</b>             | <b>Source</b>                             |
| <i>Actin-Gal4</i>               | Jan lab                                   |
| <i>HS-Gal</i>                   | Bloomington Stock Center (BL2077)         |
| <i>Twist-Gal4</i>               | Bloomington Stock Center                  |
| <i>Mhc-Gal4</i>                 | Bloomington Stock Center                  |
| <i>arm-Gal4</i>                 | Bloomington Stock Center (BL1560)         |
| <i>69B-Gal4</i>                 | Bloomington Stock Center (BL1774)         |
| <i>ppk-Gal4</i>                 | Jan lab                                   |
| <i>Lsp2-Gal4</i>                | Bloomington Stock Center (BL6357)         |
| <i>Mai311-Gal4</i>              | Quan Yuan                                 |
| <i>P0206-Gal4</i>               | Pierre Leopold                            |
| <i>477-Gal4</i>                 | Jan Lab (Grueber et al., 2003a)           |
| <i>221-Gal4</i>                 | Jan Lab (Grueber et al., 2003a)           |
| <i>ss-Gal4</i>                  | Michael Kim, unpublished                  |
| <i>elav-Gal4</i>                | Bloomington Stock Center (BL458)          |
| <b>Reporters</b>                | <b>Source</b>                             |
| <i>tgph</i>                     | Bloomington Stock Center (BL8165)         |
| <i>arm<sup>weep</sup></i>       | Fabrice Roegiers (Clyne et al., 2003)     |
| <i>MHC<sup>weep</sup></i>       | Fabrice Roegiers (Clyne et al., 2003)     |
| <i>Nrx-IV<sup>CA06597</sup></i> | Flytrap (flytrap.med.yale.edu)            |
| <i>UAS-mCD8-RFP</i>             | Elizabeth Gavis                           |
| <i>UAS-mCD8-GFP</i>             | Bloomington Stock Center (many stocks)    |
| <i>UAS-mCD2-</i>                | Jan lab (Sabina Zimmerman, unpublished)   |
| <i>Cherry</i>                   |                                           |
| <i>ppk-EGFP</i>                 | Jan lab, (Grueber et al., 2003b)          |
| <i>tub-EGFP</i>                 | Cohen Lab (Brennecke et al., 2003)        |
| <i>tub-EGFP.ban</i>             | Cohen Lab (Brennecke et al., 2003)        |

## Figure Legends

Figure S1. Measurement of dendrite coverage index.

The dendrite coverage index was defined as the ratio of the territory covered by the dorsal field of a dorsal cluster PNS neuron to the total dorsal area of that hemisegment. The ventral-most boundary for the dorsal field was generated by drawing a straight line connecting a neuron of interest to the corresponding neuron in the adjacent anterior and posterior segments.

Figure S2. Dendrites in multiple classes of da neurons exhibit a rapid growth phase followed by a scaling growth phase.

(A) Representative images of class I da neurons (Grueber et al., 2002) visualized with *Gal4<sup>221</sup>, UAS-mCD8-GFP*. Class I dendrites cover their characteristic region of the body wall by approximately 24 hr AEL and then maintain this coverage for the remainder of larval development.

(B) Representative images of class III da neurons (Grueber et al., 2002) visualized with *spineless-Gal4, UAS-mCD8-GFP*. Class III dendrites (ddaF) cover their characteristic region of the body wall by approximately 48 hr AEL and then maintain this coverage for the remainder of larval development.

Figure S3. Loss of *bantam* function causes defects in dendrite scaling.

Dendrite scaling was assessed in larvae of the indicated genotypes, represented schematically in (A), by measuring dendrite coverage index of ddaC class IV neurons (B) and the number of times dendrites of a single ddaC class IV neuron cross the

dorsal midline (C). For this and all subsequent figures, error bars represent SEM, \* denotes  $p < 0.05$  and \*\* denotes  $p < 0.001$ .  $n > 5$  for each genotype.

Figure S4. *bantam* regulates dendrite scaling of a subset of da neurons.

Dendrite growth of class III (A) or class I (B) da neurons in *bantam* mutant larvae was visualized using *spineless-Gal4* or *Gal4<sup>2221</sup>*, respectively, to drive expression of mCD8-GFP in the indicated neurons. Dendrite growth was monitored using live confocal microscopy and representative images from 96hr AEL wild type (wt) or *bantam* mutant (*ban<sup>A1</sup>*) are shown.

Figure S5. *bantam* affects dendrite dynamics. Time-lapse imaging of class IV ddaC neurons from control (A) or *bantam<sup>A1</sup>* (B) larva. Dynamic behavior of terminal dendrites was monitored for the dorsal portion of the ddaC dendritic arbor, which extends from the soma to the dorsal midline in one dimension (along the dorsal/ventral axis) and is delimited by segment boundaries in the other dimension (anterioposterior axis), corresponding roughly to a 250 x 250  $\mu\text{m}$  region in 96 hr AEL larvae. Dynamic terminals were classified as follows: growing terminals (increased in length over the time-lapse); newly formed terminals (dendrite branch initiation events that occur over the time-lapse; a subset of the “growth” category); retracting terminals (reduced length over the time-lapse); and lost branches (terminal dendrites that completely retract and are lost over the time-lapse; a subset of the “retraction” category). For comparable portions of the arbors in (A) and (B), terminal dendrite loss and branch initiation are represented by red and

blue circles, respectively, and dynamics are depicted in traces with dendrite retraction and growth depicted by red and blue lines, respectively. Neurons were imaged at 24 hr intervals beginning at 72 hr AEL using live confocal microscopy. Prior to imaging and between imaging sessions larvae were grown on yeasted grape juice agar plates at 25°C. Representative control and *bantam* mutant neurons are shown at 72 hr and 96 hr AEL. Scale bars are 50  $\mu\text{m}$ .

Figure S6. *bantam* regulates dendrite scaling independent of pathways known to regulate dendritic tiling.

(A-D) *bantam* regulates dendrite scaling independent of pathways known to regulate dendritic tiling. Dendrite coverage at 96 hr AEL in *esc* (A), *esc; ban* (B), *fry* (C) or *ban, fry* (D) mutant larvae was visualized using *ppk*-EGFP. The interface of two *ddaC* neurons at the dorsal midline (blue hatched box) is shown below each image. (E) Quantitation of dendrite coverage index.  $n > 10$  for each genotype. Scale bars are 50  $\mu\text{m}$ .

Figure S7. *bantam* cell-autonomously promotes dendrite growth

MARCM analysis was conducted as previously described (Grueber et al., 2002). MARCM clones were imaged from fixed samples and for each clone the entire dendrite arbor was captured and traces were generated using NeuroLucida software. From these traces we calculated the total number of dendrite branchpoints for *ddaE* class I (A) or *dda C* class IV (B) dendrites as well as the total dendrite length of *ddaE*

class I (A) or dda C class IV (B) dendrites in control or *bantam*<sup>A1</sup> mutant MARCM clones. *n* > 6 neurons for each genotype.

Figure S8. *bantam* function in epithelial cells is sufficient for dendrite scaling.

The ability of transgenic expression of *bantam* directed by a variety of Gal4 drivers to rescue dendrite growth and larval growth defects of *bantam* mutants was assayed at 96 hr AEL. Representative images for rescue data from 96 hr AEL larvae presented in Figure 6A-6C are shown. Genotypes are as follows: (A) *UAS-ban/+; ppk-EGFP* (B) *UAS-ban/+; ban*<sup>A1</sup>, *ppk-EGFP* (C) *elav-Gal4/+; UAS-ban/+; ban*<sup>A1</sup>, *ppk-EGFP* (D) *UAS-ban/Mhc-Gal4; ban*<sup>A1</sup>, *ppk-EGFP* (E) *UAS-ban/twi-Gal4; ban*<sup>A1</sup>, *ppk-EGFP* (F) *UAS-ban/69B-Gal4; ban*<sup>A1</sup>, *ppk-EGFP* (G) *UAS-ban/HS-Gal4; ban*<sup>A1</sup>, *ppk-EGFP*.

## References

- Brennecke, J., Hipfner, D.R., Stark, A., Russell, R.B., and Cohen, S.M. (2003). *bantam* encodes a developmentally regulated microRNA that controls cell proliferation and regulates the proapoptotic gene *hid* in *Drosophila*. *Cell* 113, 25-36.
- Clyne, P.J., Brotman, J.S., Sweeney, S.T., and Davis, G. (2003). Green fluorescent protein tagging *Drosophila* proteins at their native genomic loci with small P elements. *Genetics* 165, 1433-1441.
- Grueber, W.B., Jan, L.Y., and Jan, Y.N. (2002). Tiling of the *Drosophila* epidermis by multidendritic sensory neurons. *Development* 129, 2867-2878.

Grueber, W.B., Jan, L.Y., and Jan, Y.N. (2003a). Different levels of the homeodomain protein cut regulate distinct dendrite branching patterns of *Drosophila* multidendritic neurons. *Cell* *112*, 805-818.

Grueber, W.B., Ye, B., Moore, A.W., Jan, L.Y., and Jan, Y.N. (2003b). Dendrites of distinct classes of *Drosophila* sensory neurons show different capacities for homotypic repulsion. *Curr Biol* *13*, 618-626.



Supplemental Figure 1

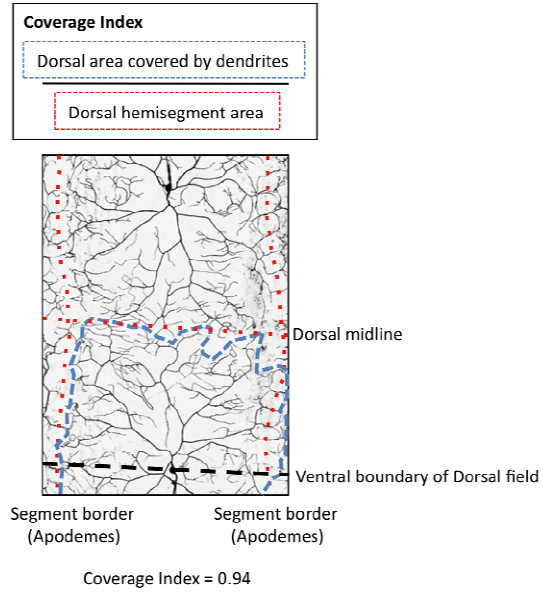

Supplemental Figure 2

**A** Class I da neurons

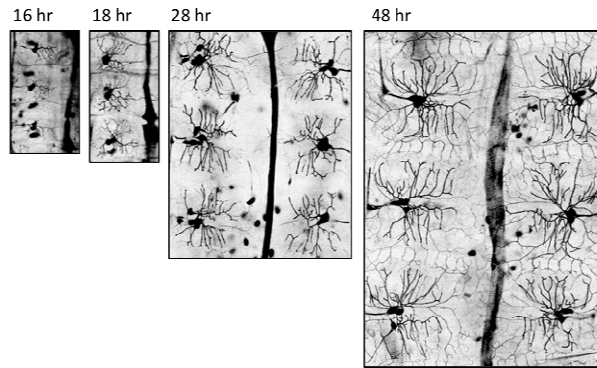

**B** Class III da neurons

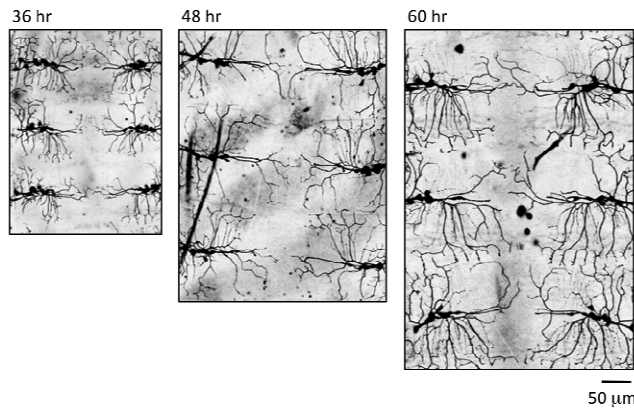

Supplemental Figure 3

**A**

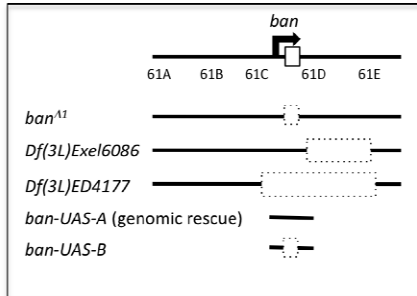

**B**

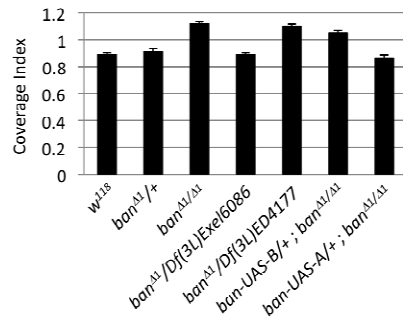

**C**

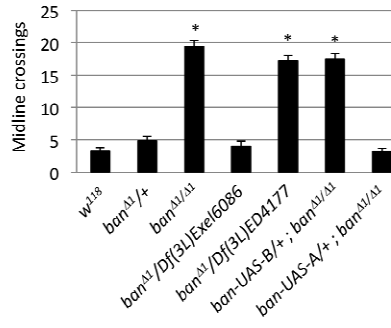

Supplemental Figure 4

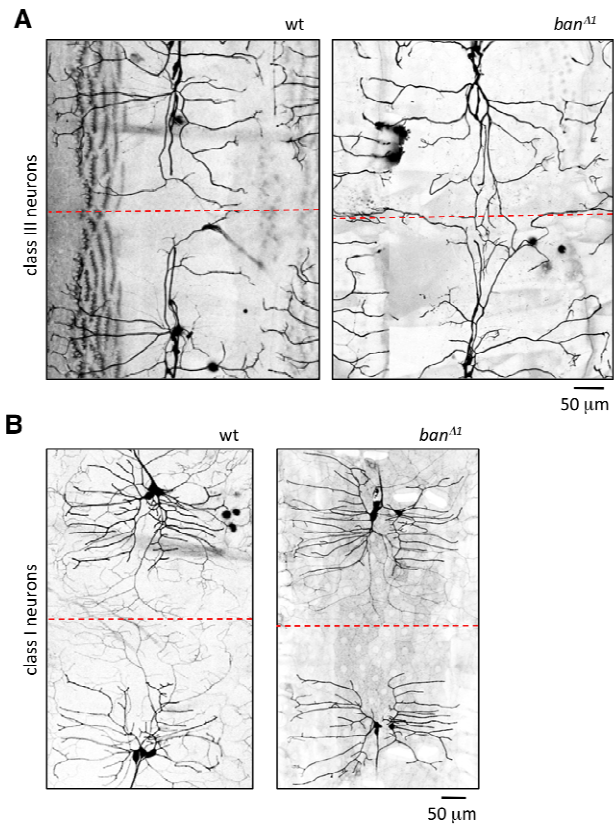

Supplemental Figure 5

**A** *ppk-EGFP*

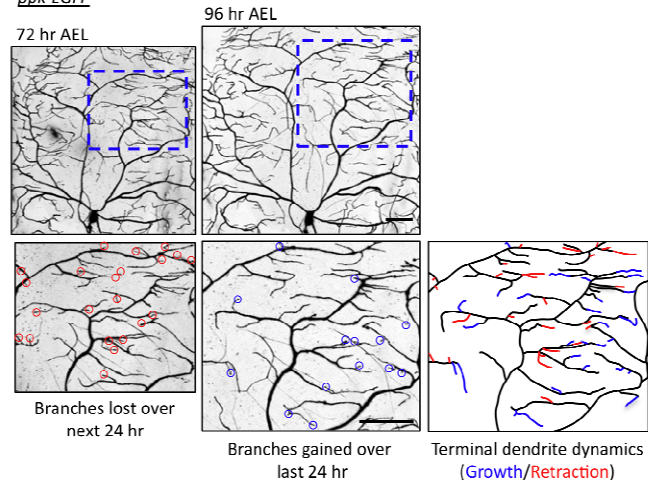

**B** *ban<sup>Δ1</sup>; ppk-EGFP*

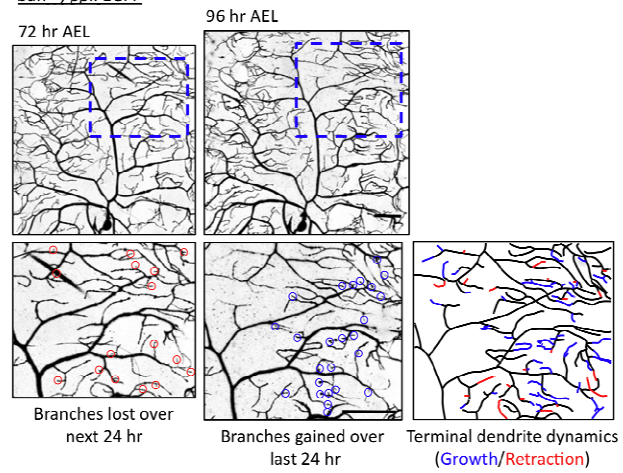

Supplemental Figure 6

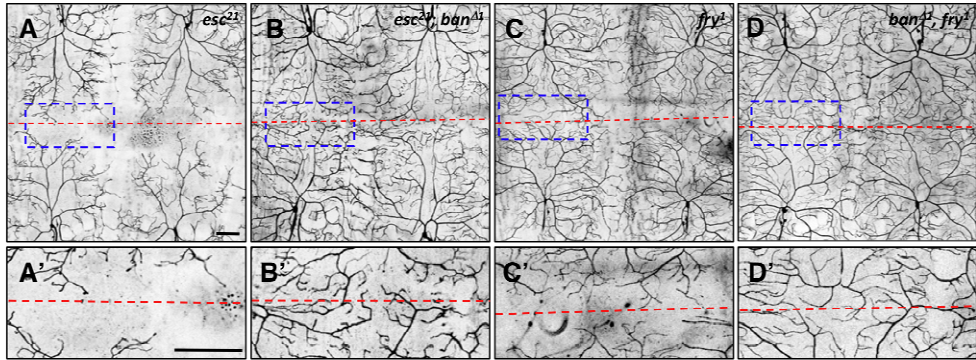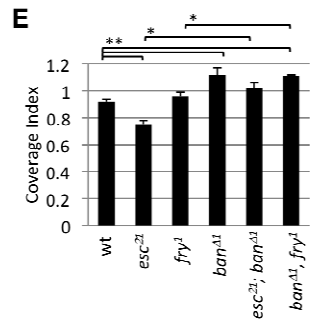

Supplemental Figure 7

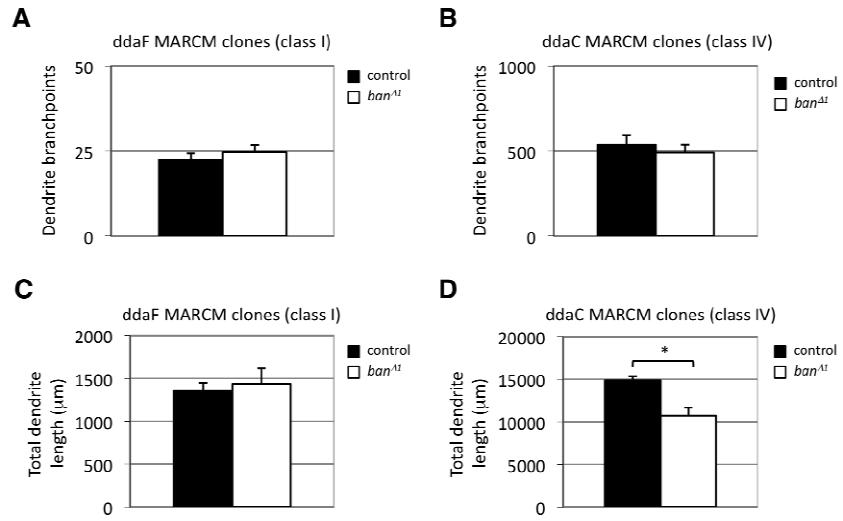

Supplemental Figure 8

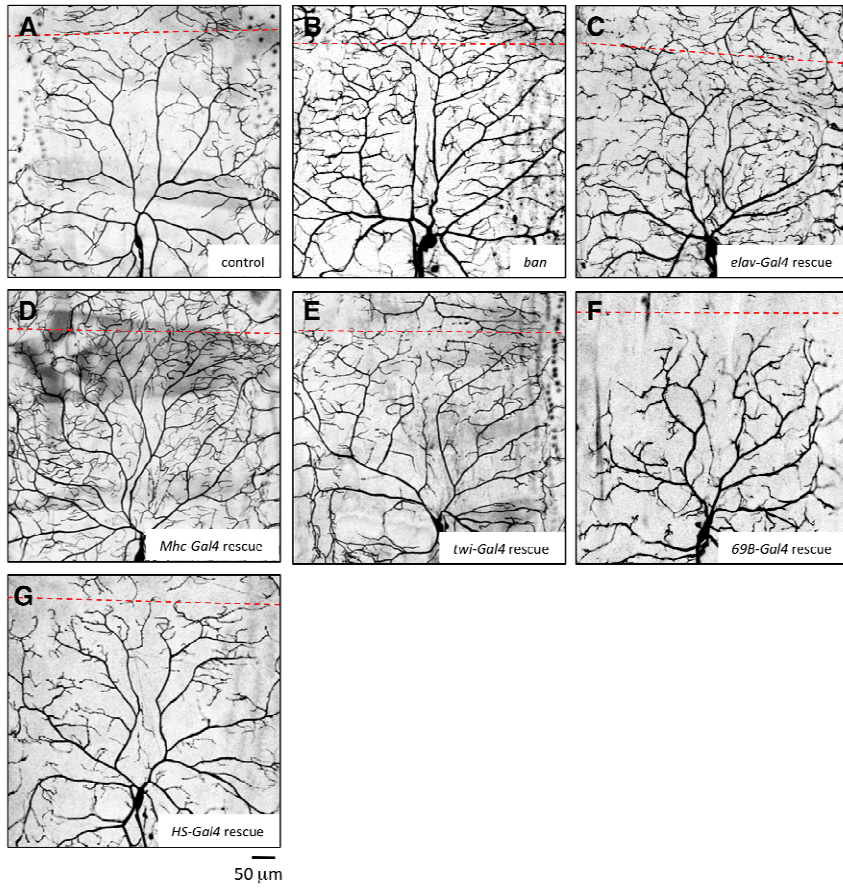

Supplement: NIHMS149998-supplement-01.pdf [file NIHMS149998-supplement-01.pdf]
